# Supplementary material
Source: publisher figshare collection journal article supplement (https://acs.figshare.com/ndownloader/files/3866056)
Supplement: Supplementary file 1 [file 3866056]

## **An Open Tubular Ion Chromatograph**

Bingcheng Yang,<sup>a,b,⊥</sup> Min Zhang,<sup>a,⊥</sup> Tinakorn Kanyanee,<sup>a,c,⊥</sup> Brian N Stamos and Purnendu K.

Dasgupta<sup>a\*</sup>

<sup>a</sup> Department of Chemistry and Biochemistry, The University of Texas at Arlington, Arlington, Texas  
76019-0065

<sup>b</sup> School of Pharmacy, East China University of Science and Technology,  
Shanghai 200237, China

<sup>c</sup> Department of Chemistry, Chiangmai University, Chiangmai 50200, Thailand

# **SUPPORTING INFORMATION**

**Table S1. OTIC program sequence for sample injection and separation, one cycle**

| step | Duration Time              | SV1 | SV2 | IV        | Pressure                       | comment                                                                                                                     |
|------|----------------------------|-----|-----|-----------|--------------------------------|-----------------------------------------------------------------------------------------------------------------------------|
| 1    | 1 s                        | off | Off | load      | $P_{inj}$<br>(typical, 14 psi) | System initialization; apply pressure to the system;<br>Sample has been loaded in IV before running the program             |
| 2    | 1 s                        | off | Off | injection | $P_{inj}$                      | Switch IV to make the sample loop to connect to the eluent line                                                             |
| 3    | 800 ms                     | on  | Off | injection | $P_{inj}$                      | Open SV1 to move the undiluted sample zone to the Tee                                                                       |
| 4    | $t_{inj}$<br>(100-5000 ms) | off | Off | Injection | $P_{inj}$                      | Close SV1 for introducing sample into the capillary column                                                                  |
| 5    | 3 s                        | on  | Off | Injection | $P_{inj}$                      | Open SV1 again for cleaning the remaining sample in the Tee and the line                                                    |
| 6    | 1 s                        | off | Off | load      | $P_{sep}$<br>(14-100 psi)      | Close SV1 and increase the pressure for beginning the separation; trigger data acquisition                                  |
| 7    | $t_{sep}$                  | off | Off | load      | $P_{sep}$                      | Separation step. The duration time ( $t_{sep}$ ) is depended by the duration time of chromatography and column equilibrium. |
| 8    | 800 ms                     | off | On  | load      | $P_{inj}$                      | Open SV1 for release tank pressure (when $P_{sep} > P_{inj}$ )                                                              |
| 9    | 1 s                        | off | Off | load      | $P_{inj}$                      | Return to the initial status for next cycle                                                                                 |

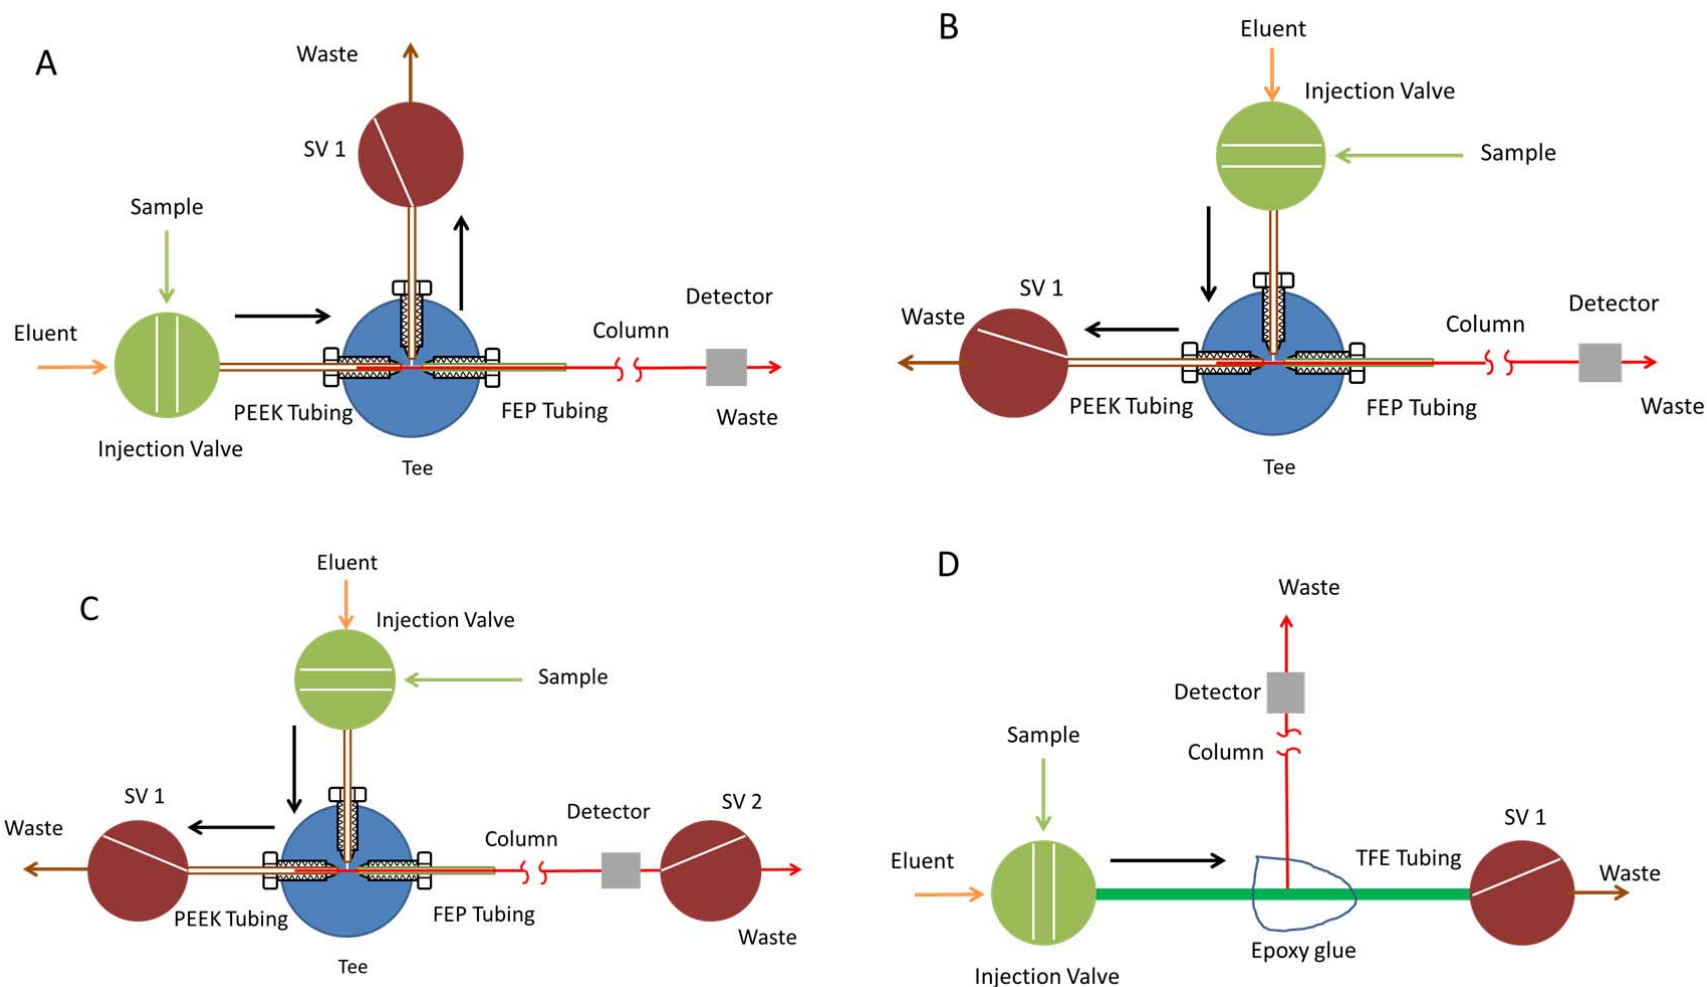

**Figure S1.** Comparison of autoinjected volumes ( $V_{aut}$ ) with different configurations ( $r = 9.8 \mu\text{m}$ ,  $L = 70$  cm, PMMA): **A.** The capillary column is inserted into the eluent inlet tubing through the tee,  $V_{aut} = 279$  pL; **B.** The capillary column is inserted into the eluent outlet tubing,  $V_{aut} = 38$  pL; preferred configuration; used in this work; **C.** The capillary column is inserted into the eluent outlet tubing. The outlet of column was connected to an additional valve (SV2); when the sample is passing through the tee, SV2 was shut off to prevent flow into the column,  $V_{aut} = 51$  pL; **D.** custom tee: hole drilled through a PEEK tube wall, column connected through the hole and epoxy adhesive was used to fix the column,  $V_{aut} = 149$  pL;

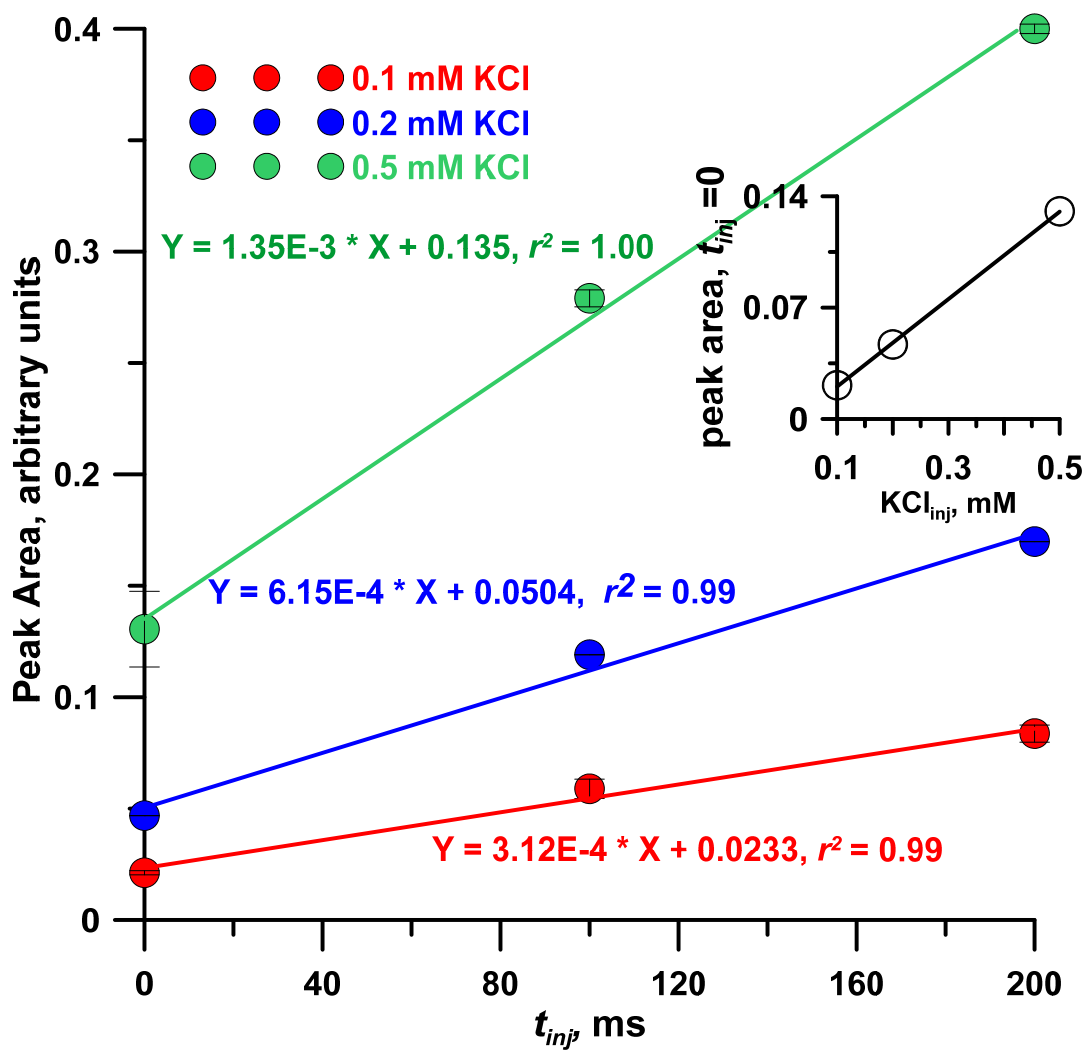

**Figure S2.** The Peak Area of  $Cl^-$  at different injection time ( $n=3$ ). Conditions: Triplicate injection, 1 mM NaBz eluent,  $r=9.8 \mu m$ ,  $L = 70$  cm,  $P_{Elu}$  30 psi, 63 nL/min.

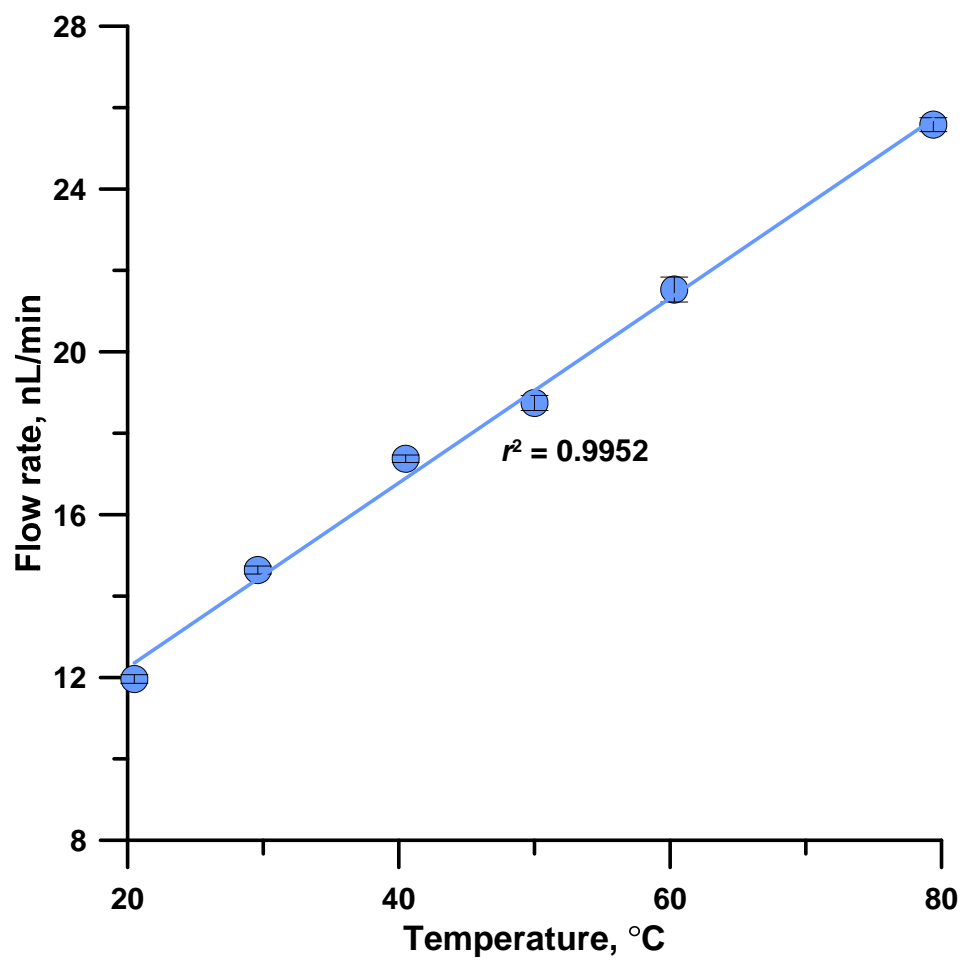

**Figure S3.** Silica capillary,  $r = 5 \mu\text{m}$ ,  $L = 55 \text{ cm}$ . 2 mM sodium benzoate, pressure fixed at 55 psi. Flow rates were measured gravimetrically.

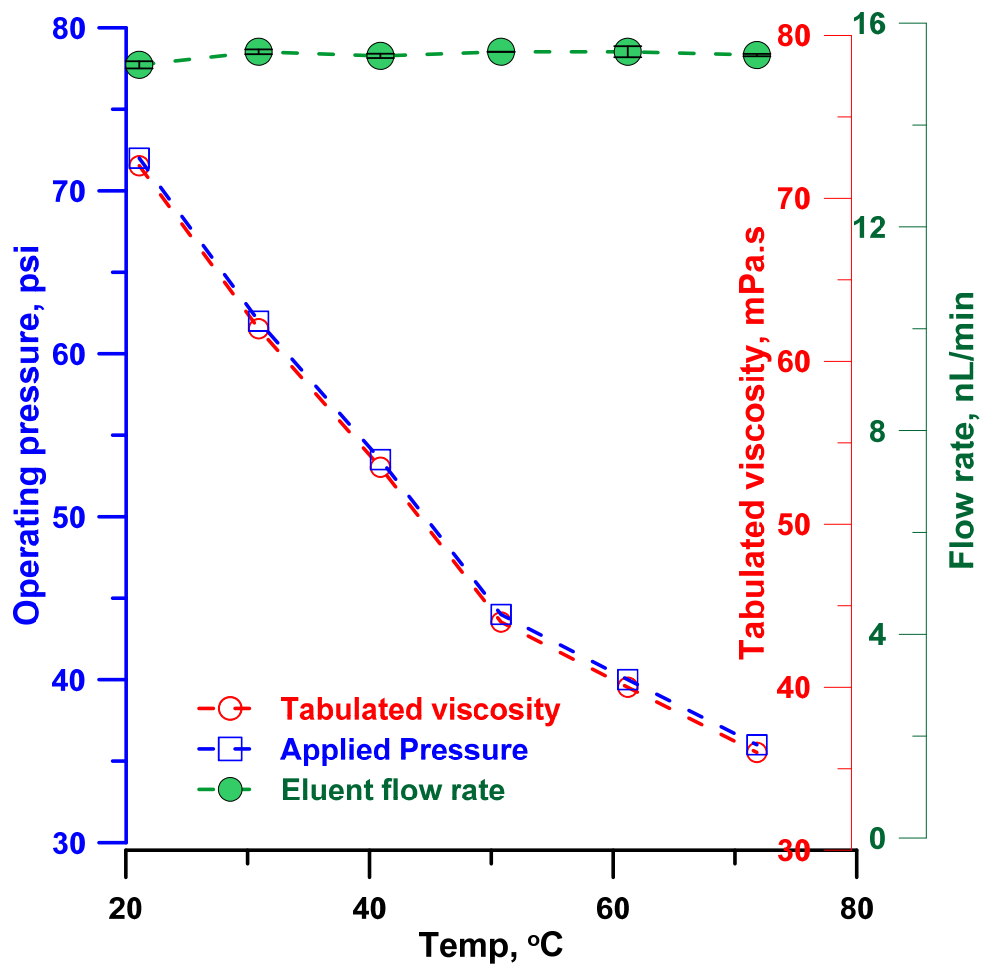

**Figure S4.** Maintaining constant flow rate by varying applied pressure as temperature varies. Silica capillary,  $r = 5 \mu\text{m}$ ,  $L = 55 \text{ cm}$ , 2 mM Na-Benzate. Flow rate measured gravimetrically.

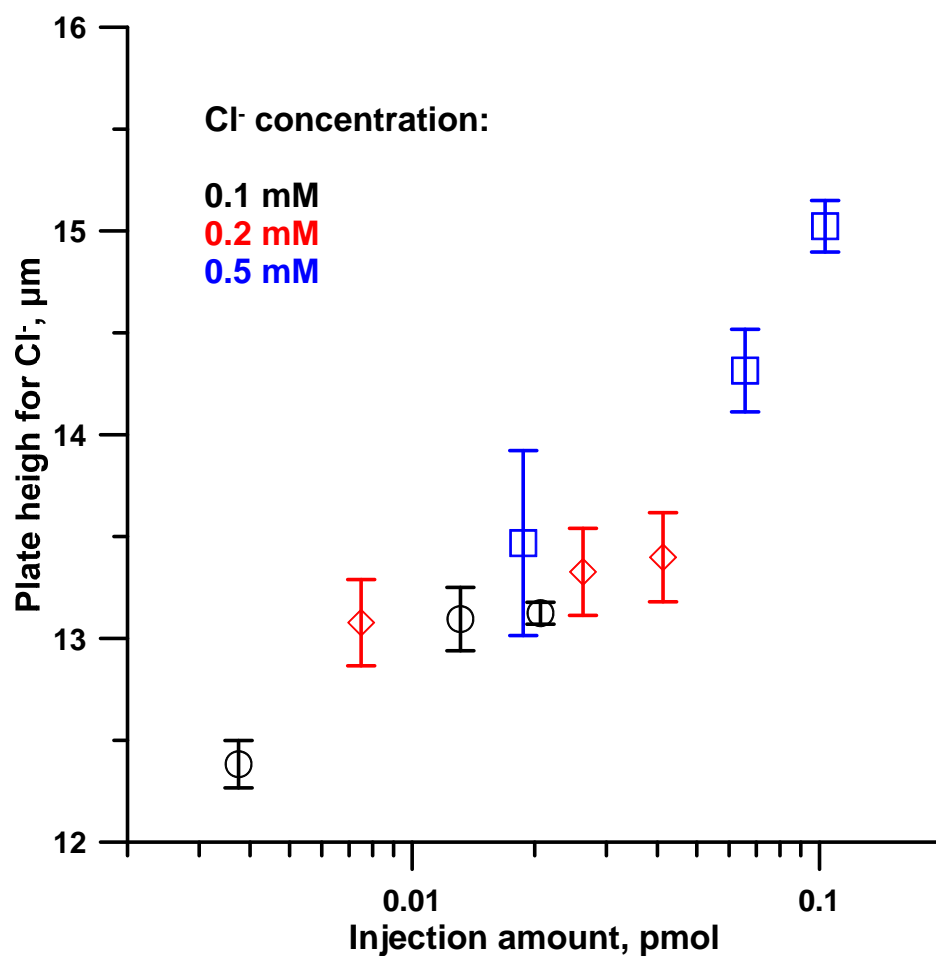

**Figure S5.** Plate height of Cl<sup>-</sup> as a function of amount injected. 0.1, 0.2 or 0.3 mM KCl was injected for 0 (autoinjection), 100 or 200 ms at 14 psi. Triplicate injection, 1 mM NaBz eluent,  $r = 9.8 \mu\text{m}$ ,  $L = 70 \text{ cm}$ ,  $P_{Elu} = 30 \text{ psi}$ , 63 nL/min

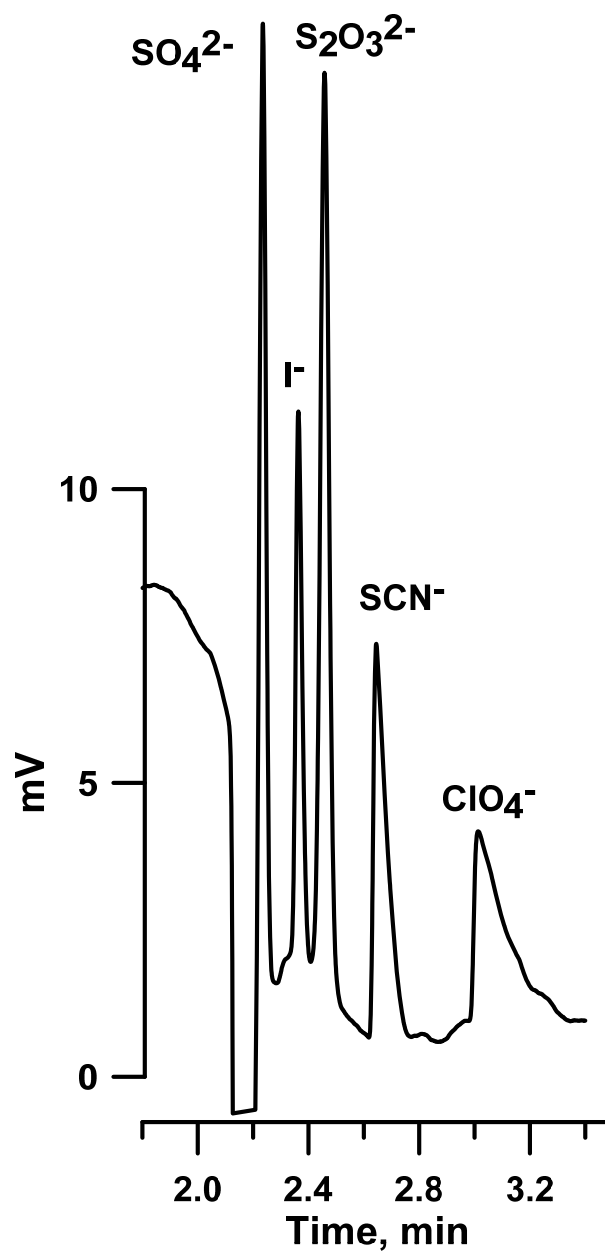

**Figure S6.** Chromatogram of strongly retained anions.  $r = 9.8 \mu\text{m}$ ,  $L = 70 \text{ cm}$ ; Eluent, 2 mM phthalate,  $\text{pH} = 7.4$ ; samples, 200  $\mu\text{M}$   $\text{SO}_4^-$ ,  $\text{I}^-$ ,  $\text{S}_2\text{O}_3^-$ ; 500  $\mu\text{M}$   $\text{ClO}_4^-$ ,  $\text{SCN}^-$ ; injection volume 100  $\mu\text{L}$ ;  $P_{\text{Elu}} = 45 \text{ psi}$ , linear velocity 0.54 cm/s (96 nL/min).

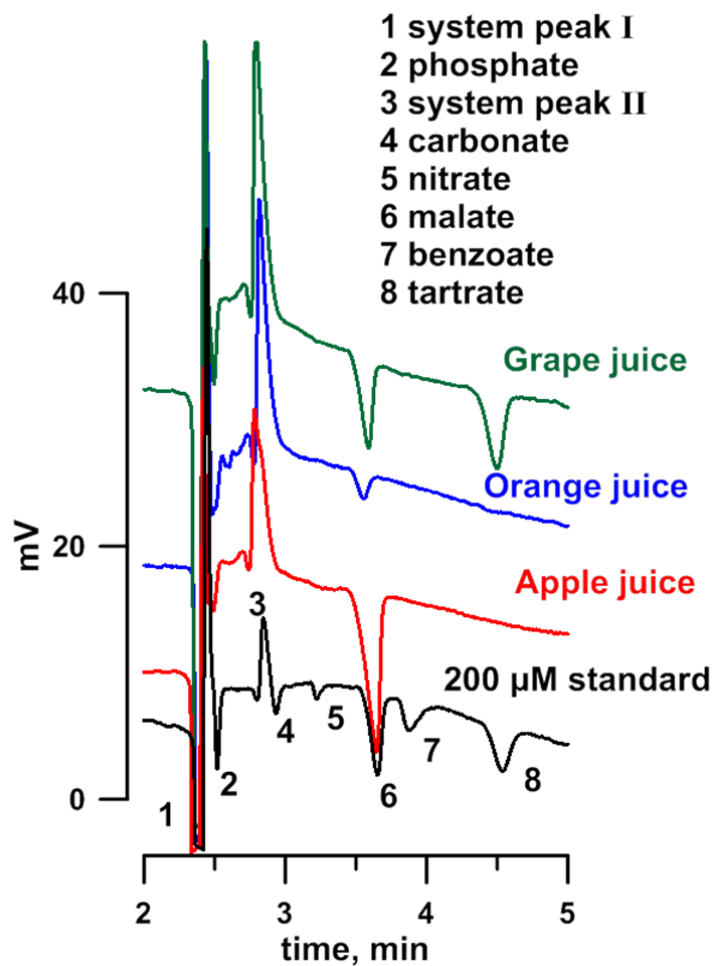

**Figure S7.** Chromatograms of separation typical organic acids in fruit juice samples. Conditions: ( $r=8.5\ \mu\text{m}$ ,  $L = 59\ \text{cm}$  long; injection volume,  $1.8\ \text{nL}$ ; Eluent,  $1\ \text{mM}\ \text{Na}_2\text{SO}_4 + 1\ \text{mM}\ \text{NH}_4\text{OAc}$ ,  $\text{pH} = 5.0$  (adjusted with  $\text{HOAc}$ );  $P_{\text{Elu}}=40\ \text{psi}$ , linear velocity  $0.40\ \text{cm/s}$  ( $26\ \text{nL/min}$ ). standard concentrations:  $200\ \mu\text{M}$  each analyte. Citrate takes too long under these conditions and is better eluted with a phthalate eluent.

**Table S2.** Inorganic and organic anions concentration in samples

|               | Chloride    | Nitrate     | malate      | tartrate   | citrate     |
|---------------|-------------|-------------|-------------|------------|-------------|
| Grape juice   | 4.226±0.023 | 0.256±0.012 | 1.190±0.080 | 18.42±1.34 | 0.545±0.152 |
| Apple juice   | 0.891±0.020 | 0.252±0.015 | 24.58±0.74  | ND         | ND          |
| Orange juice  | 1.378±0.037 | ND          | 0.066±0.007 | ND         | 13.48±0.48  |
| Mineral water | 0.146±0.006 | 0.076±0.003 | 3.050±0.285 | ND         | ND          |

Concentrations given in mM, uncertainties represent  $\pm 1$  SD (n=3).

Inorganic anions were determined with a benzoate eluent, citrate was determined with a phthalate eluent, other organic acids were determined with a acetate buffered sulfate eluent (see Figure S7).

**Table S3.** Analytical parameters for the separation of inorganic anions and organic anions <sup>a</sup>

|                                             | Linear range<br>( $\mu$ M) | R      | RSD <sup>b</sup><br>(%) | LOD <sub>1</sub> <sup>c</sup><br>( $\mu$ M) | LOD <sub>2</sub> <sup>d</sup><br>( $\mu$ M) |
|---------------------------------------------|----------------------------|--------|-------------------------|---------------------------------------------|---------------------------------------------|
| F <sup>-</sup>                              | 10-400                     | 0.9972 | 4.92                    | 2.6                                         | 1.8                                         |
| Cl <sup>-</sup>                             | 5-250                      | 0.9980 | 3.37                    | 1.4                                         | 0.8                                         |
| NO <sub>2</sub> <sup>-</sup>                | 5-250                      | 0.9985 | 4.82                    | 1.9                                         | 1.0                                         |
| Br <sup>-</sup>                             | 5-250                      | 0.9994 | 3.22                    | 1.5                                         | 0.7                                         |
| NO <sub>3</sub> <sup>-</sup>                | 5-250                      | 0.9993 | 3.00                    | 2.3                                         | 1.0                                         |
| SO <sub>4</sub> <sup>2-</sup>               | 10-400                     | 0.9997 | 0.68                    | -                                           | 3.3                                         |
| H <sub>2</sub> PO <sub>4</sub> <sup>-</sup> | 40-400                     | 0.9979 | 7.46                    | -                                           | 11.1                                        |
| Malate                                      | 40-400                     | 0.9994 | 3.53                    | -                                           | 12.6                                        |
| Benzoate                                    | 100-400                    | 0.9971 | 7.33                    | -                                           | 28.5                                        |
| Tartrate                                    | 70-400                     | 0.9994 | 4.38                    | -                                           | 21.9                                        |
| Citrate                                     | 100-400                    | 0.9969 | 5.07                    | -                                           | 32.0                                        |

- a) Eluent for F<sup>-</sup>, Cl<sup>-</sup>, NO<sub>2</sub><sup>-</sup>, Br<sup>-</sup> and NO<sub>3</sub><sup>-</sup>: 1 mM benzoate;  
 Eluent for H<sub>2</sub>PO<sub>4</sub><sup>-</sup>, malate, benzoate, tartrate: 1 mM Na<sub>2</sub>SO<sub>4</sub> and 1 mM NH<sub>4</sub>Ac, pH = 5.0 (adjusted with HAc);  
 Eluent for SO<sub>4</sub><sup>2-</sup> and citrate: 2 mM phthalate with pH 7.0 (adjusted with LiOH);
- b) n = 3; sample concentration: 200  $\mu$ M; Injected sample volume: 1.2 nL;
- c) S/N = 3 criterion verified at each stated LOD; injected sample volume: 0.5 nL;
- d) Injected sample volume: 1.2 nL

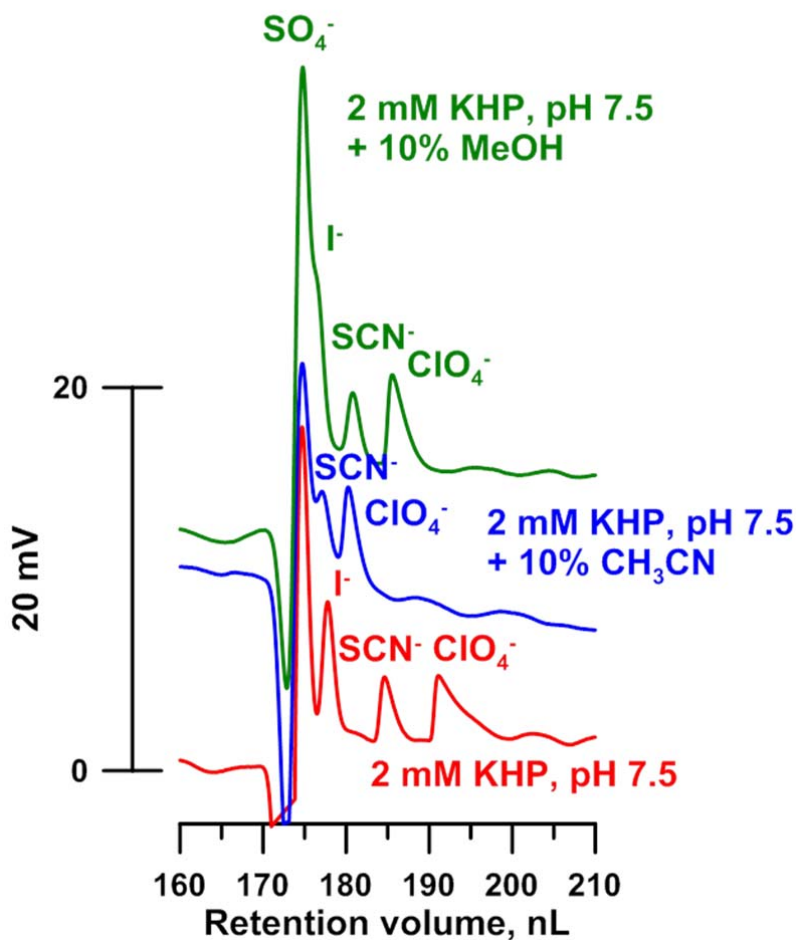

**Figure S8.** PMMA,  $r = 9.8 \mu\text{m}$ ,  $L_{\text{eff}} = 58 \text{ cm}$ . Flow rate: 48 nL/min. 500  $\mu\text{M}$  each I<sup>-</sup>, SCN<sup>-</sup>; 1 mM each SO<sub>4</sub><sup>2-</sup>, ClO<sub>4</sub><sup>-</sup>, 0.2 nL injection. Perchlorate asymmetry at 10% height changed from 8.1 to 3.4 to 2.0 in going from pure water to 10% methanol to 10% acetonitrile.

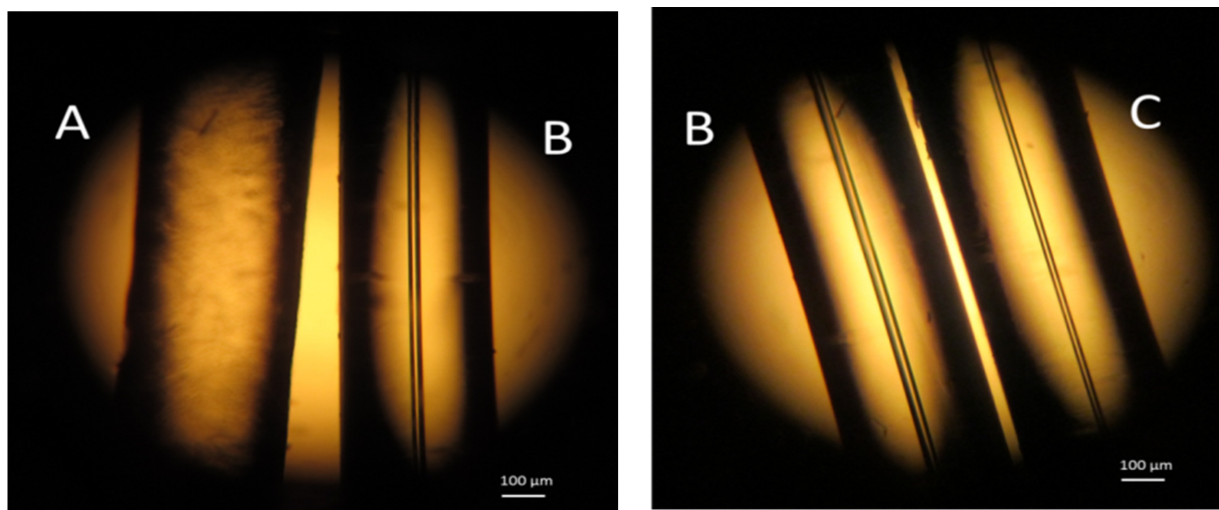

**Figure S9.** A): immersed into 50% (v/v) acetonitrile solution for 10 h; B) original PMMA capillary, without treatment with acetonitrile; C) the channel passed by 30% (v/v) acetonitrile solution for 2 h.

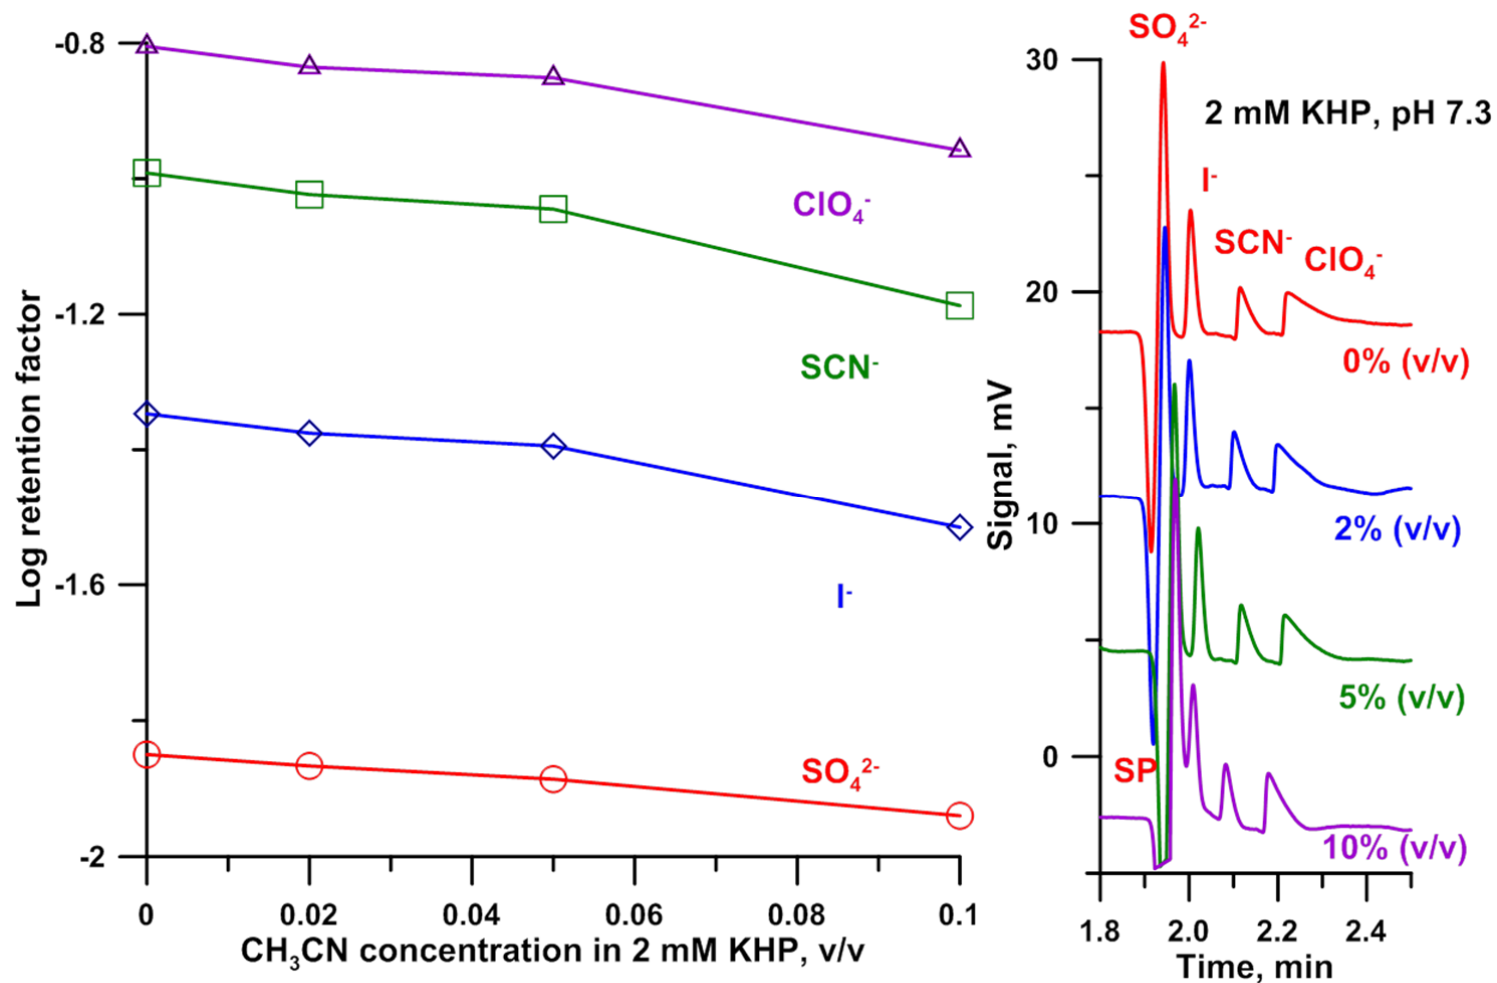

**Figure S10.** Variations in acetonitrile content in an acetonitrile containing phthalate eluent 2 mM phthalate at pH 7.3 plus acetonitrile as indicated;  $r = 7.2 \mu\text{m}$ ,  $L = 47 \text{ cm}$ , PMMA, injection volume, 0.25 nL;  $P_{Elu}$  48 psi; linear velocity 0.40 cm/s (44 nL/min). I<sup>-</sup> and SCN<sup>-</sup> at 0.5 mM, SO<sub>4</sub><sup>2-</sup> and ClO<sub>4</sub><sup>-</sup> at 1 mM.

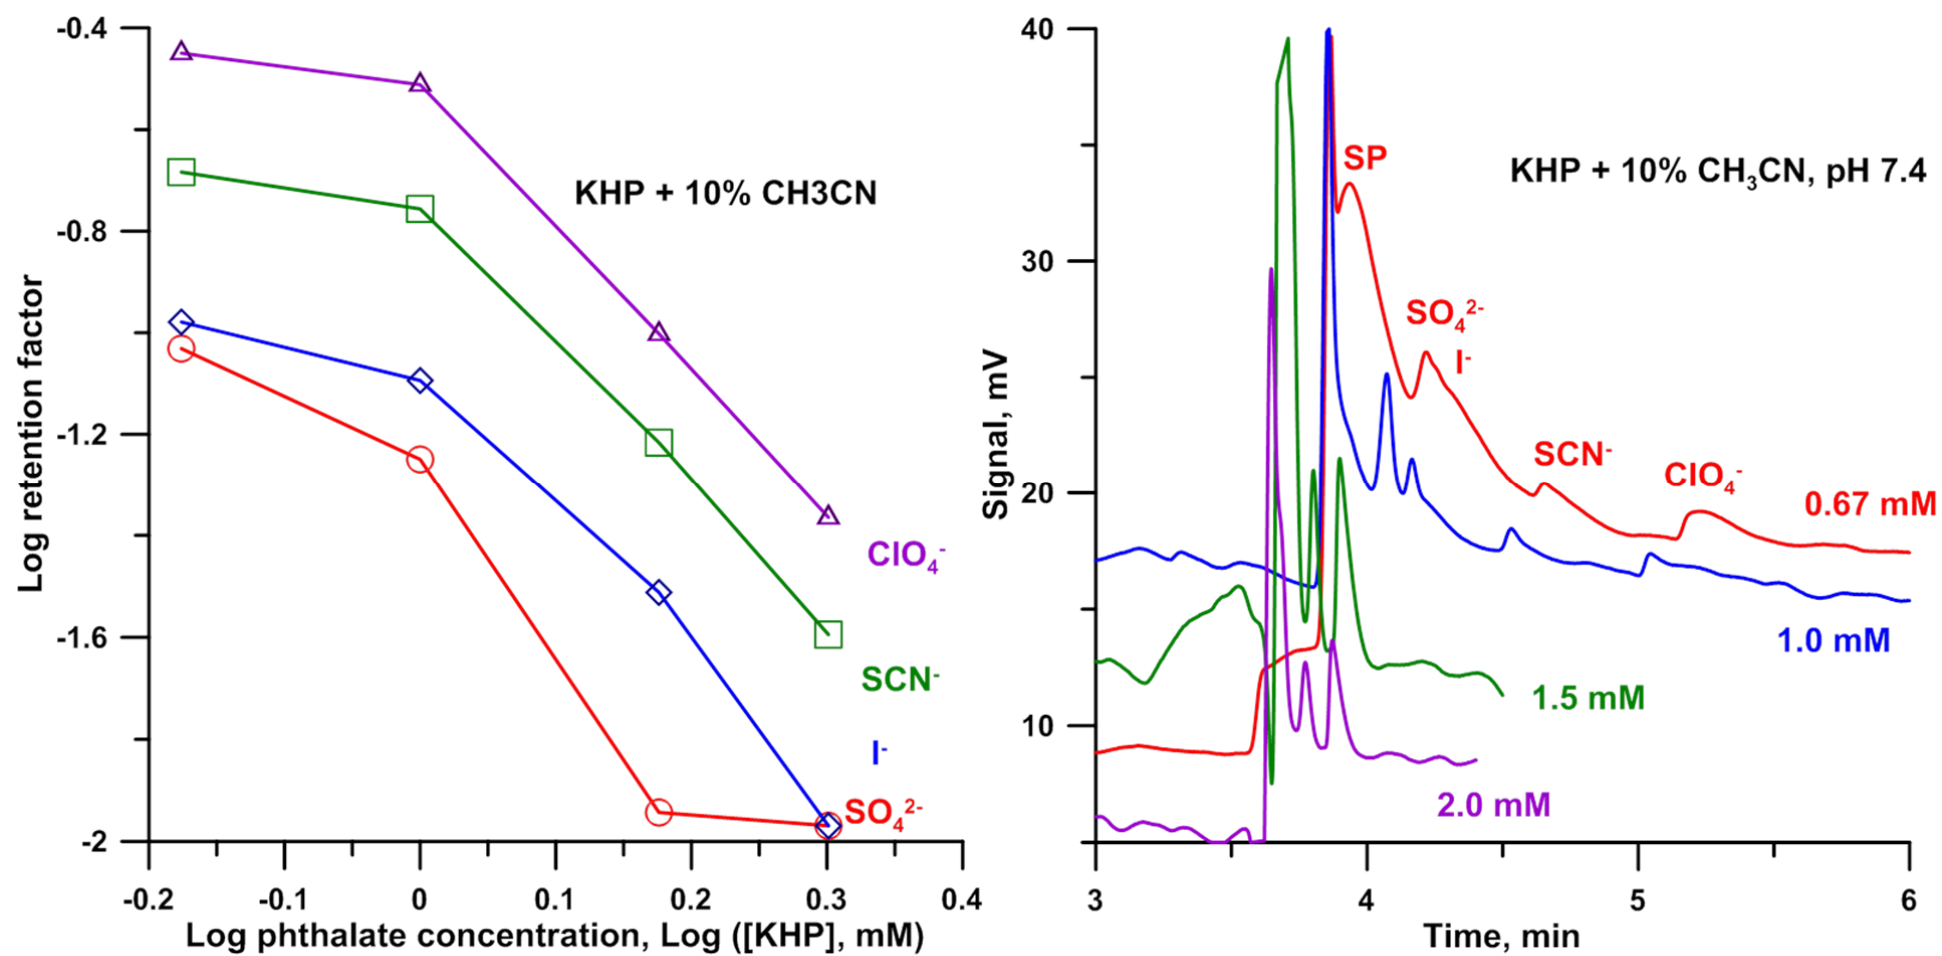

**Figure S11.** Variations in phthalate content in a phthalate eluent (pH 7.4) containing 10%v/v acetonitrile  $r = 7.2 \mu\text{m}$ ,  $L = 68 \text{ cm}$ , PMMA, injection volume, 0.2 nL;  $P_{\text{Elu}}$  48 psi, linear velocity 0.32 cm/s (31 nL/min);  $\text{I}^-$  and  $\text{SCN}^-$  at 0.5 mM,  $\text{SO}_4^{2-}$  and  $\text{ClO}_4^-$  at 1 mM.

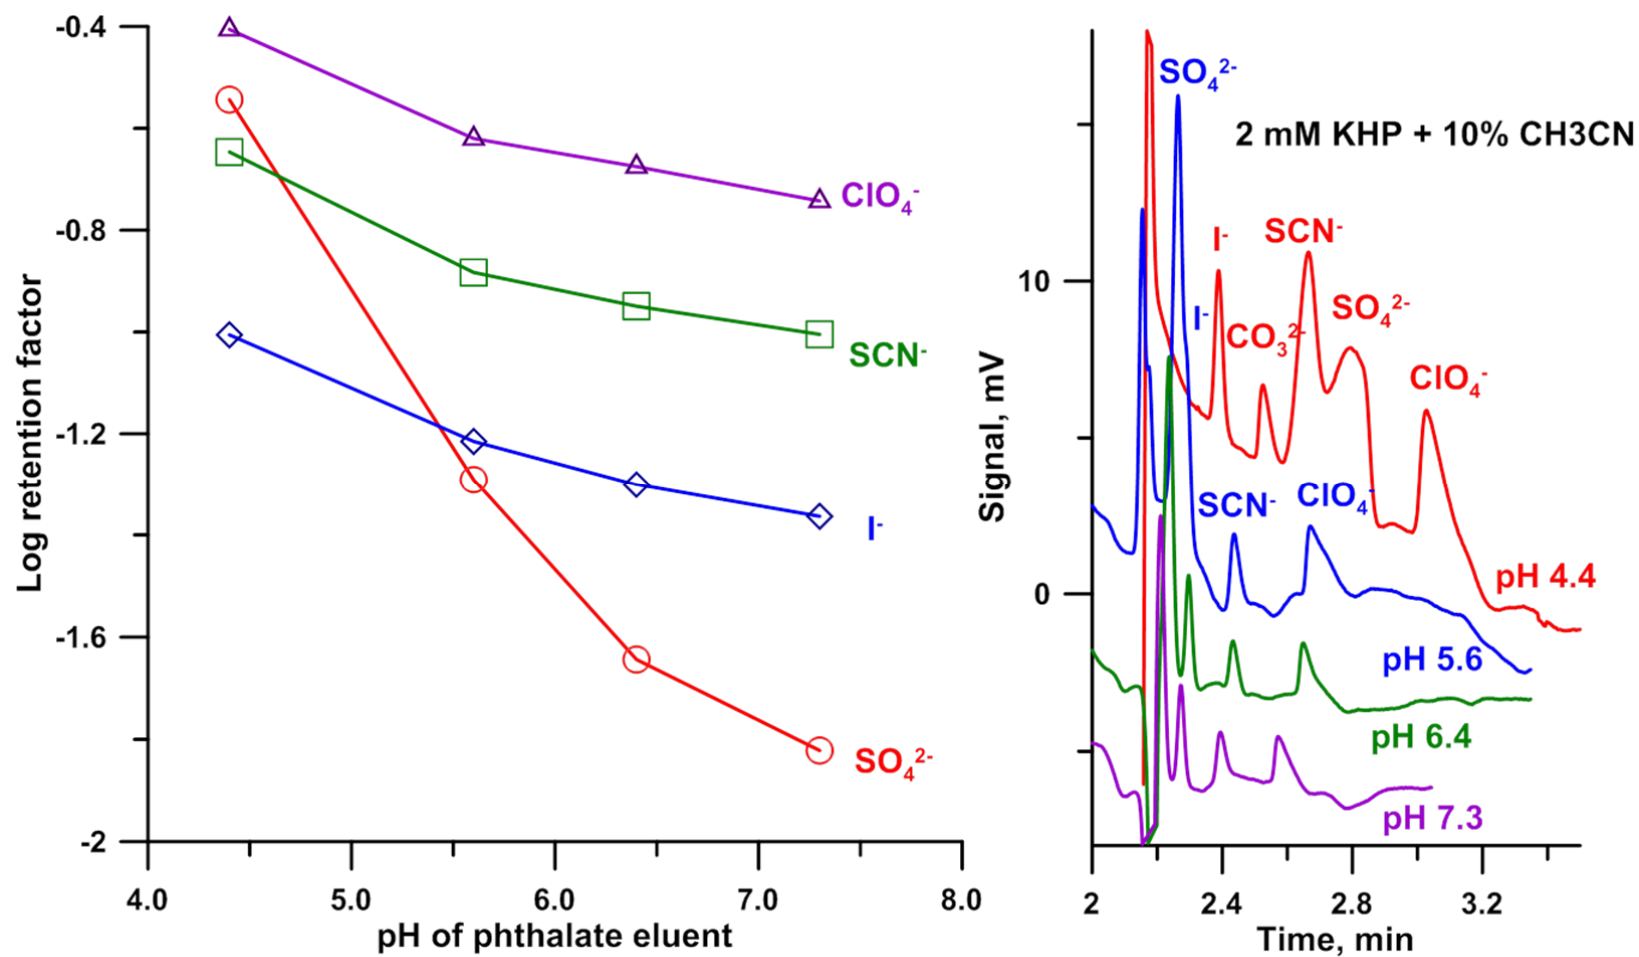

**Figure S12.** Variations in pH in a 2 mM phthalate eluent containing 10%v/v acetonitrile  $r=7.2\ \mu\text{m}$ ,  $L = 54\ \text{cm}$ , PMMA, injection volume, 0.25 nL;  $P_{\text{elu}}$  48 psi, linear velocity 0.40 cm/s (38 nL/min);  $\text{I}^-$  and  $\text{SCN}^-$  at 0.5 mM,  $\text{SO}_4^{2-}$  and  $\text{ClO}_4^-$  at 1 mM.

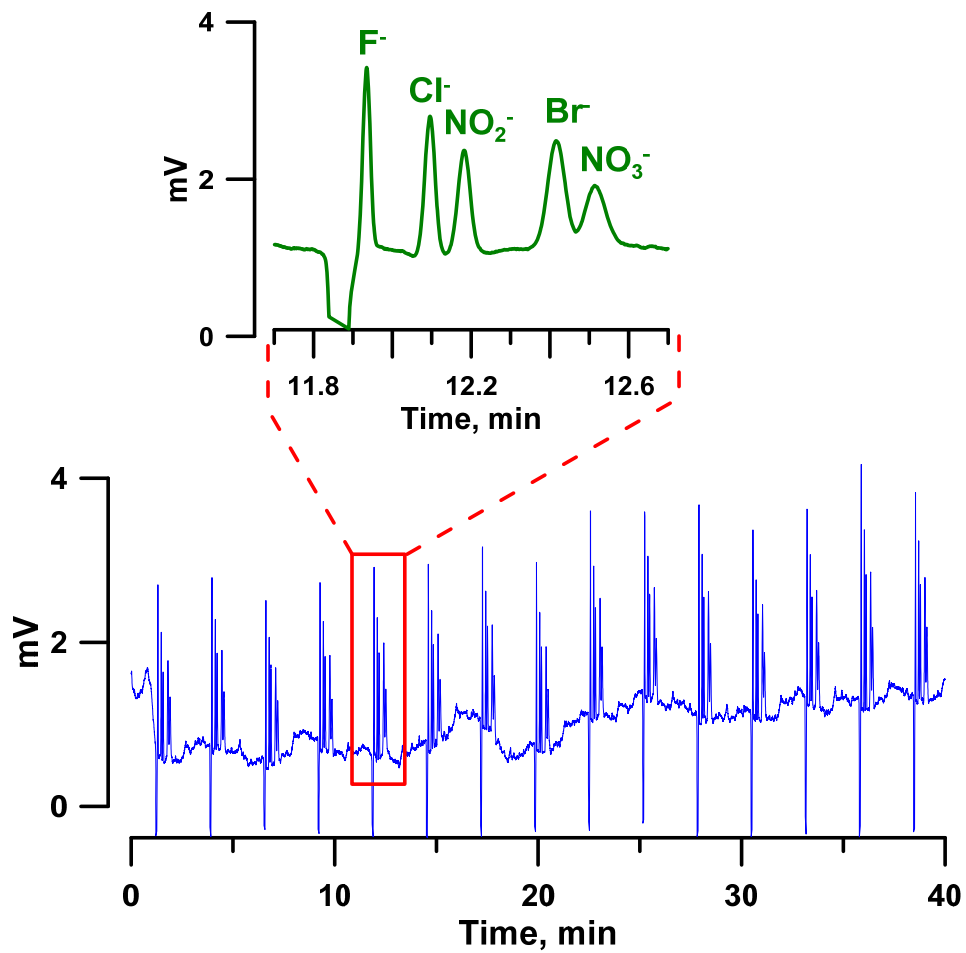

**Figure S13.** Fast separation (1 min window) of five ions.  $r = 9.8 \mu\text{m}$ ,  $L = 80 \text{ cm}$ , PMMA, injection volume, 0.48 nL; samples, 200  $\mu\text{M}$   $F^-$ ; 100  $\mu\text{M}$  of  $Cl^-$ ,  $NO_2^-$ ,  $Br^-$ ,  $NO_3^-$ ;  $P_{Elu} = 100 \text{ psi}$ , linear velocity 1.07 cm/s (191 nL/min).

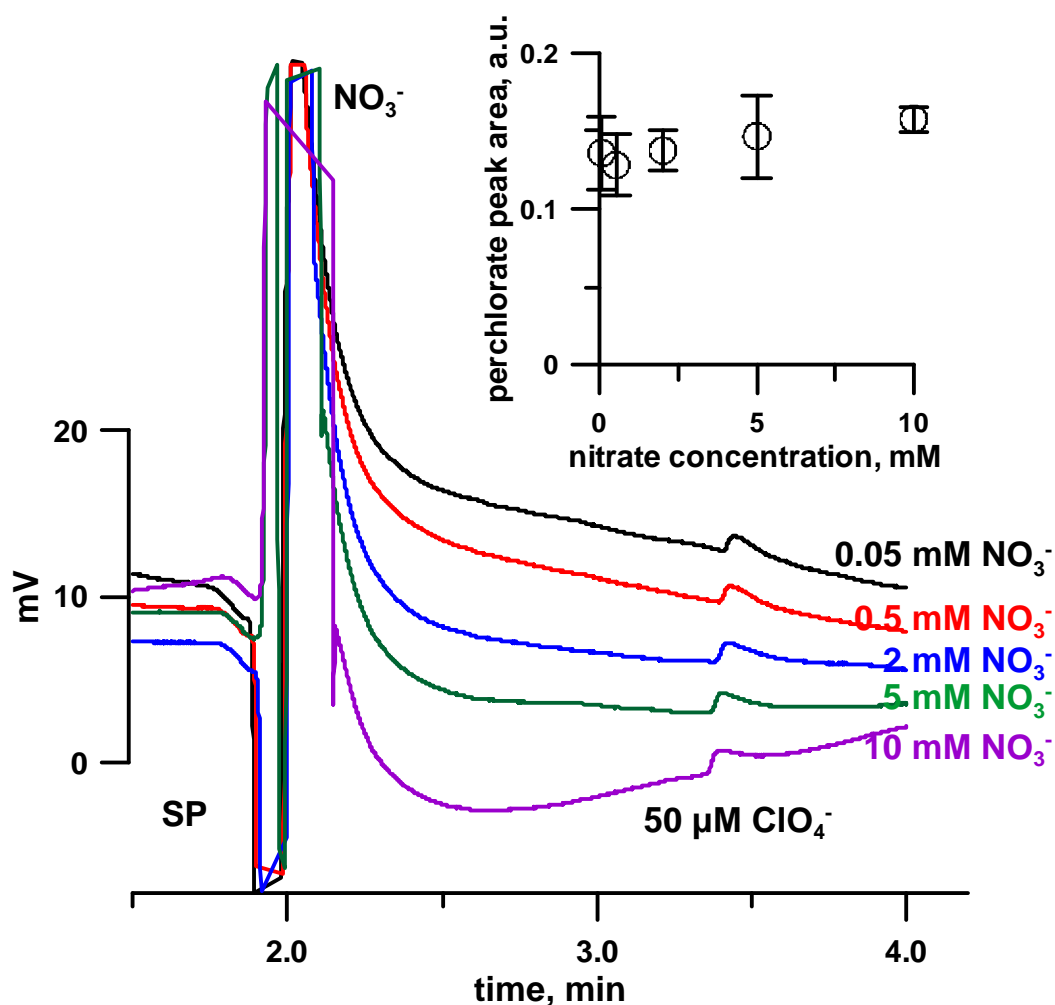

**Figure S14.** Chromatograms for the separation and quantitation of  $\text{ClO}_4^-$  in the presence of varying amounts of  $\text{NO}_3^-$  (up to 200x). The inset shows the constancy of the  $\text{ClO}_4^-$  peak area.  $r = 7.3 \mu\text{m}$ ,  $L = 40 \text{ cm}$ , PMMA,  $50 \mu\text{M ClO}_4^-$  in presence of 50 -10,000  $\mu\text{M NO}_3^-$ ; 2 mM potassium phthalate (pH 7.4) with 10% (v/v) acetonitrile. Injection volume, 4.11 nL;  $P_{\text{Elu}} = 40 \text{ psi}$ , linear velocity 0.32 cm/s (32 nL/min).

**Baseline Correction procedure.** As experiments were done without temperature control and electrical properties such as conductance are highly temperature dependent, at high sensitivities baseline drift was significant. As the periods for a chromatogram were short the drifts were mostly linear (not always) and we simply assumed the baseline drifted linearly from the start (before any peaks) to the end (after complete elution of all analytes). This was then subtracted from the raw data.
